# Supplementary material for: One-pot synthesis of ordered mesoporous zirconium oxophosphate with high thermostability and acidic properties
Source: Royal Society of Chemistry journal article supplement (doi:10.1039/c3cy00085k), 2013-01-01
Supplement: c3cy00085k.pdf [file c3cy00085k.pdf]

## One-Pot Synthesis of Ordered Mesoporous Zirconium

### Oxophosphate with High Thermostability and Acidic Properties

Zhichao Miao<sup>a,b</sup>, Leilei Xu<sup>a,b</sup>, Huanling Song<sup>a,c</sup>, Huahua Zhao<sup>a,b</sup>, Lingjun Chou<sup>a,c\*</sup>

<sup>a</sup> State Key Laboratory for Oxo Synthesis and Selective Oxidation, Lanzhou Institute of Chemical Physics, Chinese Academy of Sciences, Lanzhou 730000, People's Republic of China.

<sup>b</sup> University of Chinese Academy of Sciences, Beijing 100049, People's Republic of China.

<sup>c</sup> Suzhou Institute of Nano-Tech and Nano-Bionics, Chinese Academy of Sciences, Suzhou 215123, People's Republic of China.

---

\* Corresponding author: e-mail: ljchou@licp.cas.cn (L. J. Chou)  
Tele: +86 0931 4968066; Fax: +86 0931 4968129

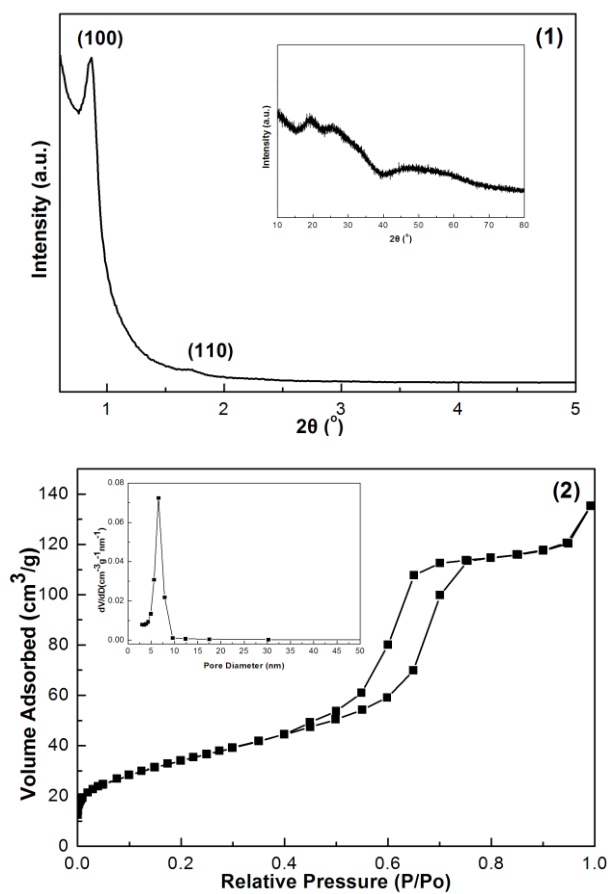

**Figure S1.** Small-angle X-ray diffraction (1) and Wide-angle X-ray diffraction (inset of (1)) patterns, isotherm (2) and pore size distributions (inset of (2)) of the M-ZrPO-1.25-500.

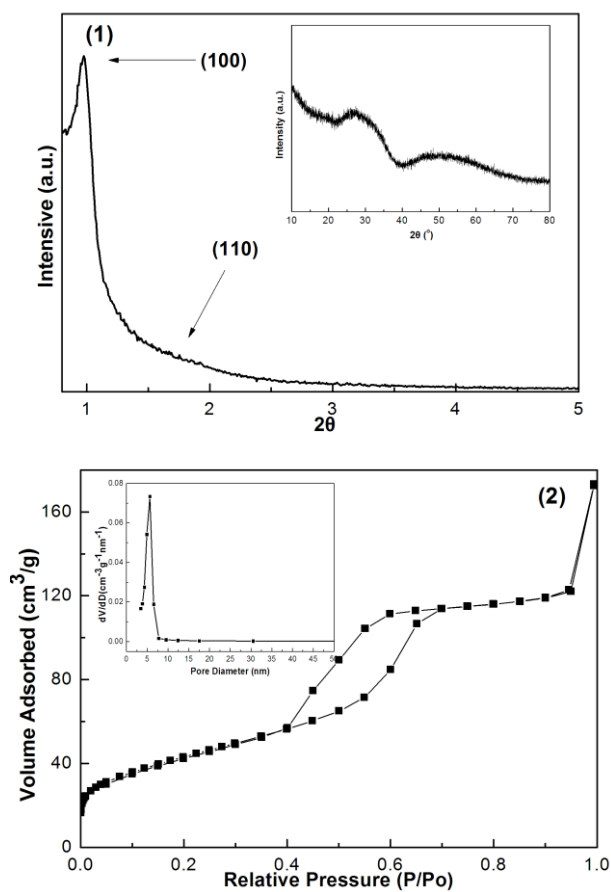

**Figure S2.** Small-angle X-ray diffraction (1) and Wide-angle X-ray diffraction (inset of (1)) patterns, isotherm (2) and pore size distributions (inset of (2)) of the used catalyst M-ZrPO-0.75-500.

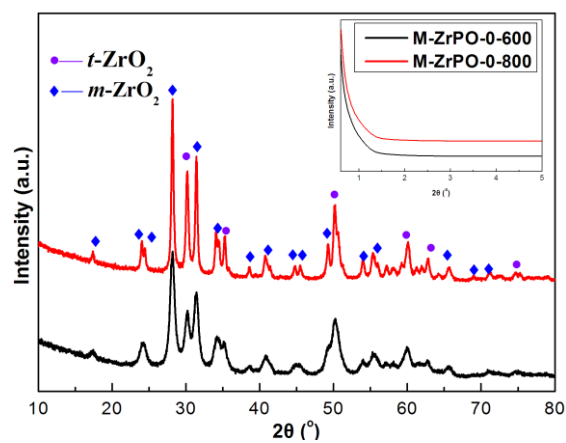

**Figure S3.** Wide-angle X-ray diffraction and Small-angle X-ray diffraction (**inset**) patterns of the M-ZrPO-0-600 and M-ZrPO-0-800.
